# Supplementary material for: A New Solution for Measuring Planck's Constant using Compton Scattering
Source: Preprints.org preprint supplement (doi:10.20944/preprints202208.0449.v1), 2022-08-26
Supplement: Supplementary file 2 [file supplementary]

## Sheet: Tables
		CODATA Values
	Planck constant	6.62607e-34
	Reduced Planck constant	1.05457e-34
	speed of light	299792458
	Gravitational constant	6.6743e-11
	Table 1 Lepton properties which determine the value of Planck's constant.
		Particle	Reduced Compton wavelength	Rest mass	Reduced Planck constant
			m	kg	kgm2/s
		Electron	3.86159e-13	9.10938e-31	1.05457e-34
		Muon	1.86759e-15	1.88353e-28	1.05457e-34
		Tau	1.11054e-16	3.16754e-27	1.05457e-34
	Table 2 Of the six product and quotient relationships between the Planck units, three have exact values based on the exact values of Planck's constant and the speed of light. The other three relationships have uncertainties comparable to the uncertainty in the gravitational constant.
		Planck unit pair	Equivalent	Value	SI Rel Std Uncertainty	units
		lP / tP	c	299792458	defined	m / s
		lP mP	ℏ / c	3.51767e-43	defined	kg m
		mP tP	ℏ / c2	1.17337e-51	defined	kg s
		lP / mP	G / c2	7.42616e-28	2.2e-05	m / kg
		mP / tP	c3 / G	4.03698e+35	2.2e-05	kg / s
		lP tP	ℏ G / c4	8.71363e-79	2.2e-05	m s
